# Supplementary material
Source: PubMed Central journal article supplement (PMC7642080)
Supplement: AEM.01397-20-s0001.pdf [file AEM.01397-20-s0001.pdf]

Supplemental Figure 1. Large amount of foam generated in Maumee Bay, Lake Erie from the *Microcystis* dominated bloom on A, July 31; B, August 2; C, August 4, 2019. The photo from July 31 was taken from the Canadian Coast Guard Ship CCGC Limnos 11 km northeast of the Toledo Water Intake (credit: Robin Rozon, Fisheries and Oceans Canada)

A.

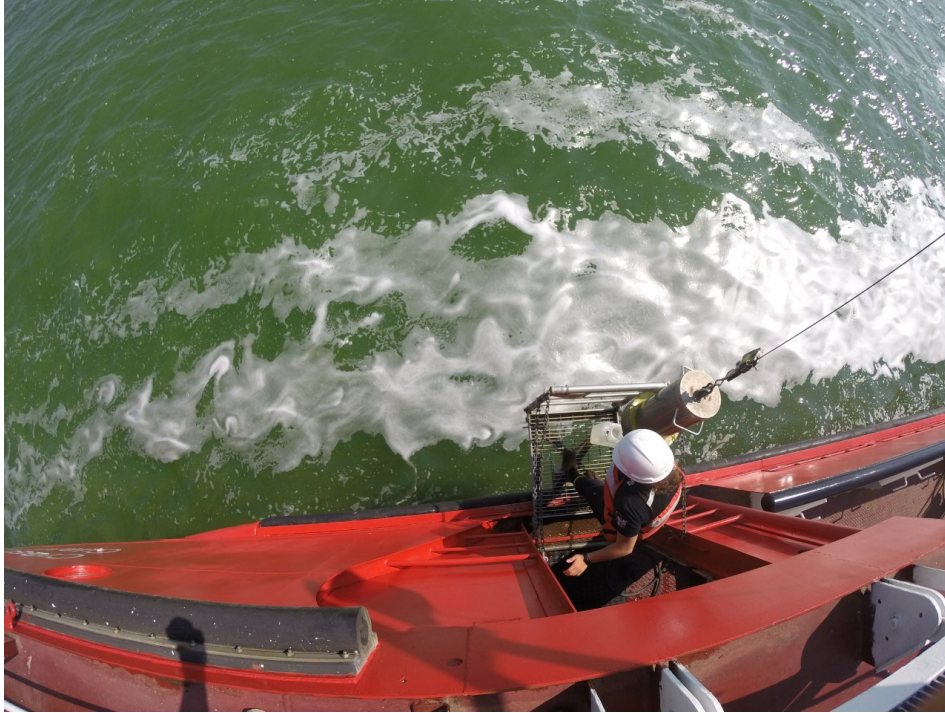

B.

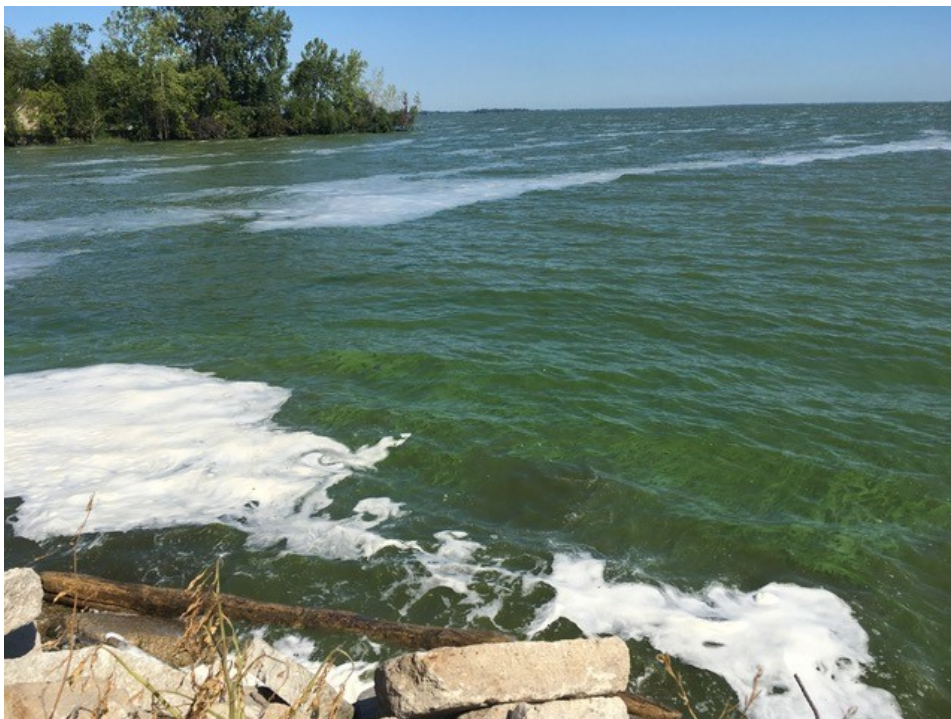

C.

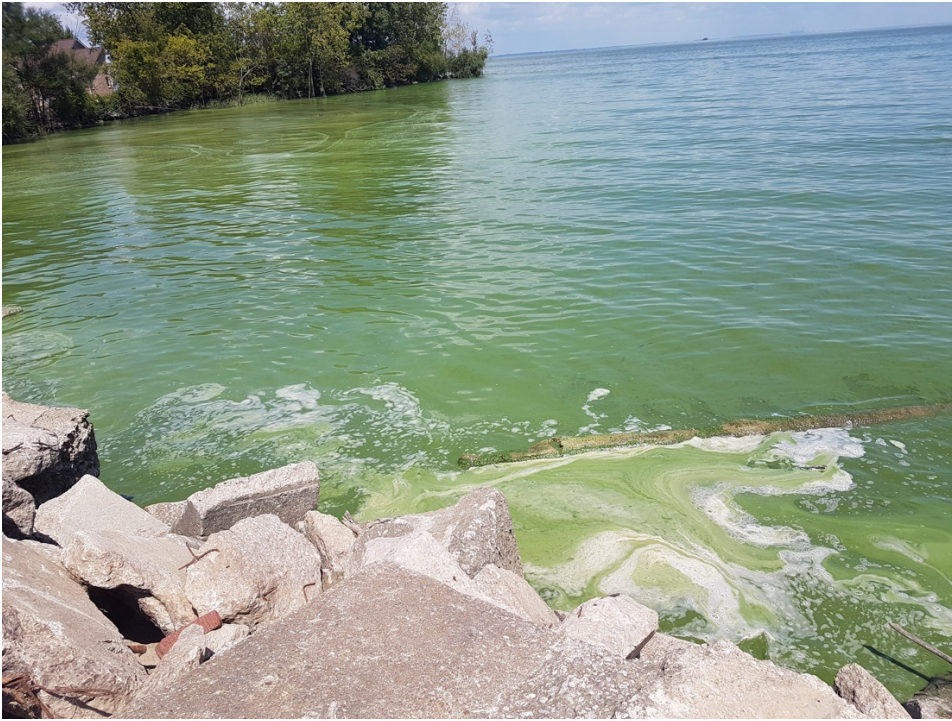

Supplemental Figure 2. Proteomic relatedness between each of the non-dominant *Microcystis* Viral Gene Fragments (MVGFs) and its closest related MVGF as described in Morimoto et al. [1].

A.

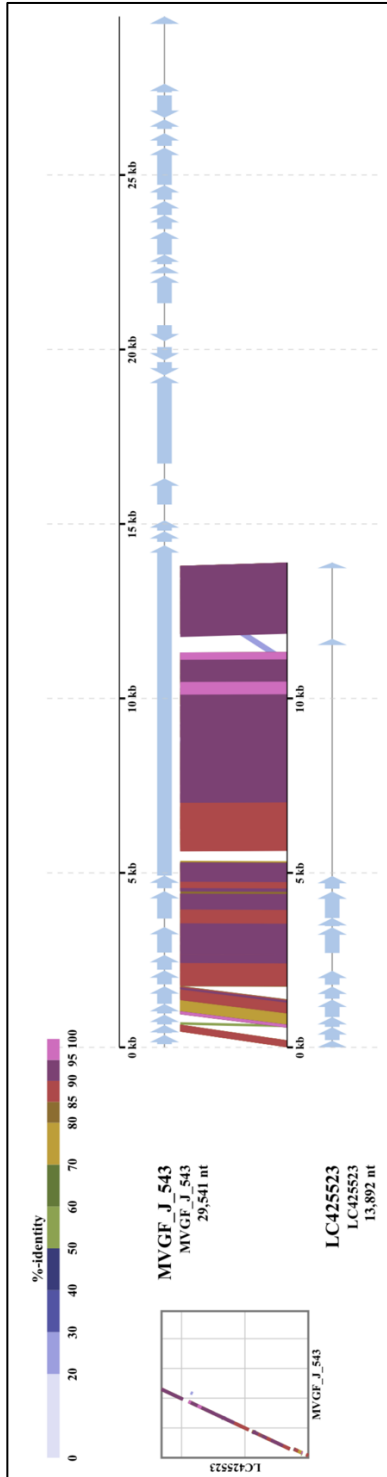

B.

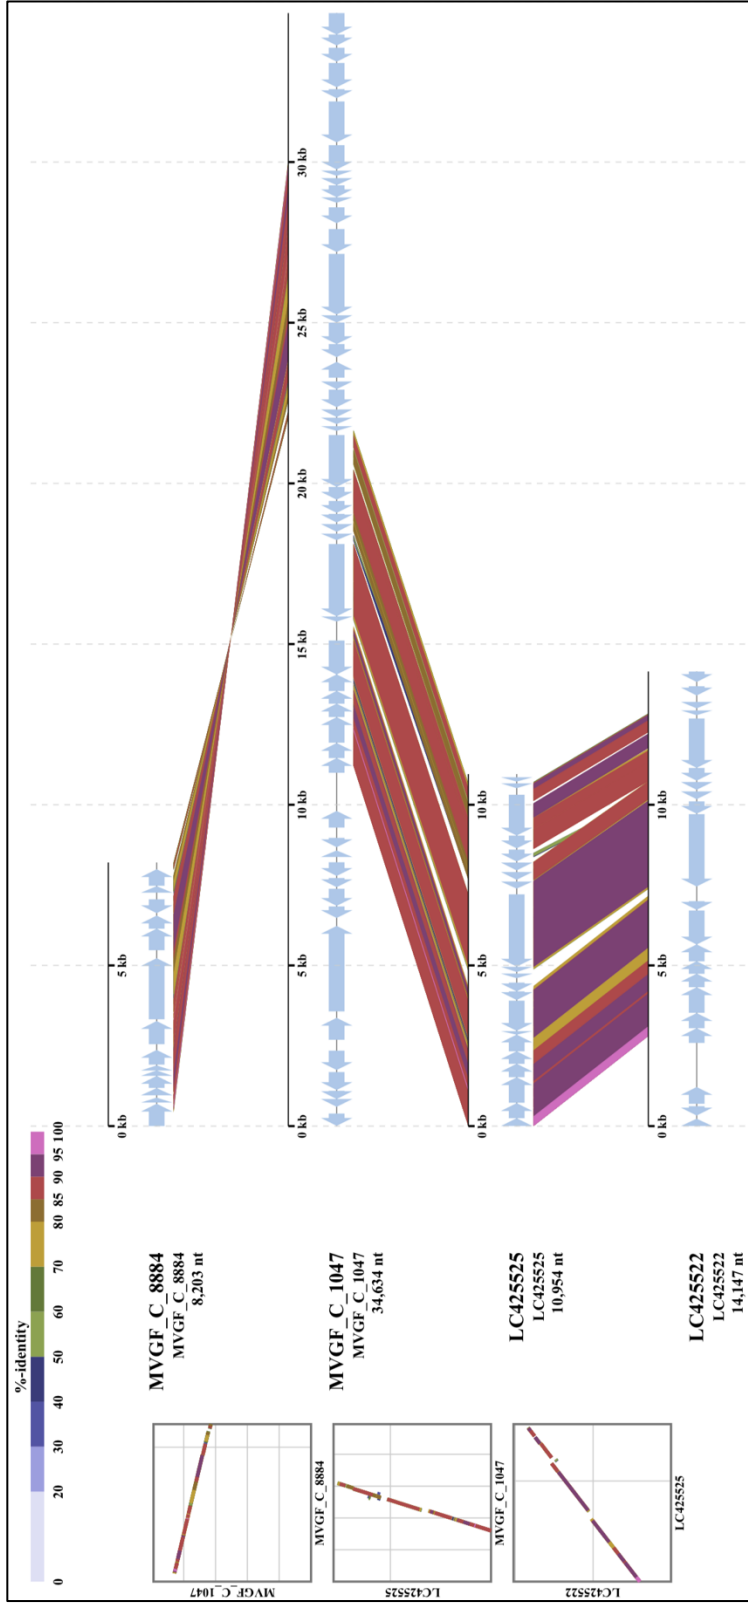

C.

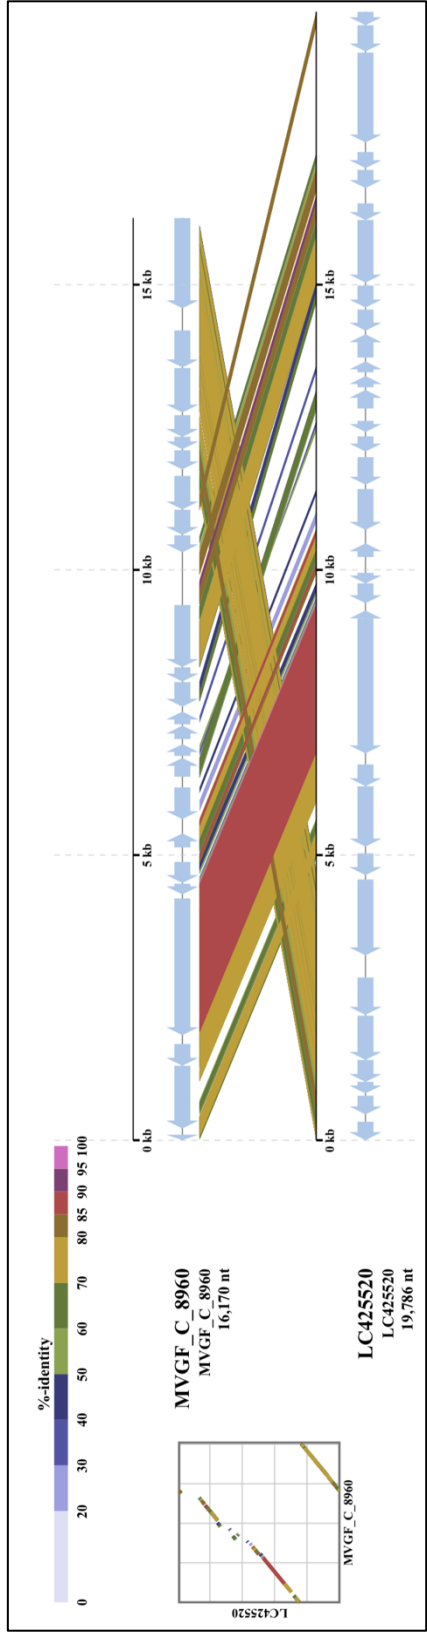

D.

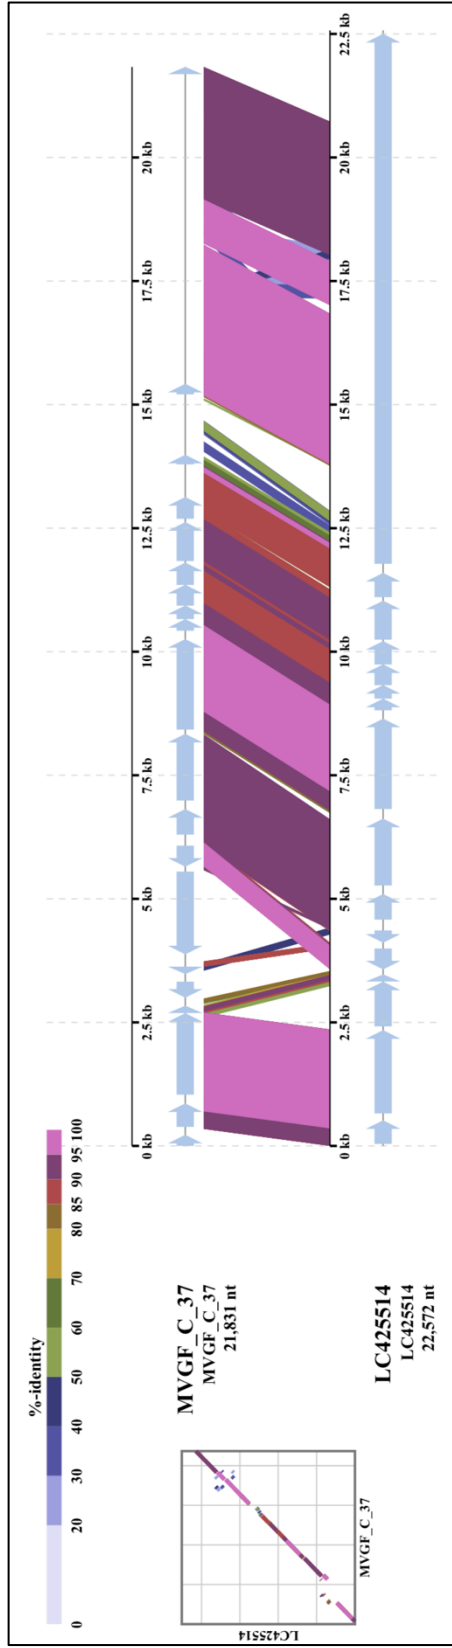

Supplemental Table 1. Metagenomic reads associated with target genes for *Microcystis aeruginosa* NIES-834 for comparative analysis of qPCR assay.

| Site       | Gene  | Primer Start | Primer Stop | Total Raw Reads | Ratio between 16S | Ratio to total 16S |
|------------|-------|--------------|-------------|-----------------|-------------------|--------------------|
| Surge Well | 16S_1 | 1885973      | 1886202     | 2555.30         | 0.4236            | NA                 |
| Surge Well | 16S_2 | 3598365      | 3598594     | 3476.45         | 0.5764            | NA                 |
| Surge Well | mcyB  | 3495004      | 3495107     | 611.88          | NA                | 0.1014             |
| Surge Well | mcyD  | 3517110      | 3517230     | 574.38          | NA                | 0.0952             |
| Intake     | 16S_1 | 1885973      | 1886202     | 2217.78         | 0.3637            | NA                 |
| Intake     | 16S_2 | 3598365      | 3598594     | 3880.10         | 0.6363            | NA                 |
| Intake     | mcyB  | 3495004      | 3495107     | 212.13          | NA                | 0.0348             |
| Intake     | mcyD  | 3517110      | 3517230     | 213.50          | NA                | 0.0350             |

Supplemental Table 2. G-block sequences used for standard curve of qPCR assay.

| G-block name                         | Sequence                                                                                                                                                                                                                                                                                                                                                                                                                                                                                                                                           | Length |
|--------------------------------------|----------------------------------------------------------------------------------------------------------------------------------------------------------------------------------------------------------------------------------------------------------------------------------------------------------------------------------------------------------------------------------------------------------------------------------------------------------------------------------------------------------------------------------------------------|--------|
| Phage portal protein<br>(MVGF_J_348) | CGTAAACTTCGCCTTTTGATAAAAATCGCCGGTTC AATTCA<br>TAATCACCAATTTTTAAAGTCCCCGACAAAACCGCCAAA<br>TCTAACCATTTTTTTGTAAATTCTTTTGTGCAATCGCCGGA<br>TTAACCACGACTGAATCACCCGATAGTTATCCCTCTCATC<br>CATCAAGGATGTTTCGCGCCGAGGAGTAACTGGTATTAGA<br>GAAATCCCGCGATAAAGCCTCATAGGATAGCCCAATCCC<br>CGCCGCCACCCCCCGCAGCATCATCTGATAAAAAGCATC<br>AAACCCCTGATTGGGACGAGTGGGGGCAAATCCCTCGAA<br>AGACTCTCCTGGATTCAAACCTCGATCGCCCCGGCTCC<br>AAACTGGTCACGCGCTGGCCTGCCATTTCTTCCGGAGCAT<br>AAACATCCGGGTGCGGCGTAGTAATAAACCCCATCACCG<br>CCGCCTGCGCCCGGGCTGCAACCAACTCAGCCTCTGTGT<br>AACCCCC | 480    |
| Phage tail collar<br>(MVGF_J_19)     | AATCGCGCCAATCATACGGGAACACAGGCAGCCAATACT<br>ATATACGATCTATCTGACACAGTGCGGGCGTTTGCATTTA<br>TTGCCGACATGCTGGCTGATATAACCATTCTAGAGAATG<br>AACTAGAGGAATTACGCGACGACCTATTCGGTGATGGTG<br>AGTTACAGCAGATCATTAAATAACATACAGCAGTTAGTCA<br>ATGATCTAATTGATAACCTAGCTGCTGCCGTAGGTGAGTT<br>AACTATAATTCAGAACCTACAGACATGCTGCGATACTAA<br>CACAACCTGCTATCAGTGGTTTACAGACTCAATTTACTACA<br>CTGAGTAACCAAATAACTGCTCAGATAGCCACCATCAAT<br>TCCACAATCAGTGATATAAACAACAGACTCAACCTAGAA<br>ATACCTAAGATAGTAGCATTACAGAAT                                                                     | 420    |
| <i>Microcystis</i><br>mcyD           | AAAAAAAAAAGGTTTCGCCTGGTCAAAGTAATTATGCCGC<br>AGCTAATGCTTTCATGGATGCTCTAATGCAGCAACGGCA<br>AAGTTTAGGATTACCTGGTATTAGTATTAATTGGGGAGCT<br>TGGGAGACGGGCAACCAAATTGATCAACAACGTTTCGCT<br>AATTGGGGTTTGCAGATGATGCCCTCTGAGCAAGCGTTTC<br>AATATCTCAGTCAGGTAATTTTAGGTGATATTACTCAAGG<br>GATAGTTCTCGATATTGATTGGTCGATTTTTTAATCAAAC<br>TTCAACATTAGTCAACCCTTTAGCGAGG                                                                                                                                                                                                     | 308    |
| <i>Microcystis</i><br>mcyB           | GATTATCCTACCGAGCGCTTGGGGGATATCCTCTCAGATT<br>CGGGGGTTTCTTTGGTGTTAACTCAGGAATCTTTAGGGGA<br>TTTTCTTCCC                                                                                                                                                                                                                                                                                                                                                                                                                                                 | 90     |
| <i>Microcystis</i><br>16S            | GCCGCGAGGTGAAACCTAATTGGCCTGAAGAAGAGCTTG<br>CGTCTGATTAGCTAGTTGGTGGGGTAAAAGCCTACCAAG<br>GCGACGATCAGTAGCTGGTCTGAGAGGATGAGCAGCCAC<br>ACTGGGACTGAGACACGGCCAGACTCCTACGGGAGGCA<br>GCAGTGGGGAATTTCCGCAATGGGCGAAAGCCTGACGG<br>AGCAACGCCGCGTGAGGGAGGAAGGTCTTTGGATT                                                                                                                                                                                                                                                                                           | 230    |



Supplemental Table 3. Standard curve characteristics for qPCR methods for cyanobacteria and cyanophages. Dynamic range and limit of detection are reported in copies per reaction. The dynamic range is the lowest to highest standard analyzed in copies per qPCR reaction. The limit of detection is the lowest value that can reasonably be detected with some certainty. The detection limit is 1 copy per reaction unless there are detections in blanks.

| DNA assay                         | Dynamic range     | Standard curve efficiency | R <sup>2</sup> value | Limit of detection |
|-----------------------------------|-------------------|---------------------------|----------------------|--------------------|
| Phage portal protein (MVGJ J_348) | 95 - 9.5E+07      | 1.05                      | 0.9874               | 1                  |
| Phage tail collar (MVGJ J_19)     | 108.5 - 1.085E+08 | 1.25                      | 0.9905               | 1                  |
| <i>Microcystis</i> mcyD           | 19.9 – 1.99E+07   | 1.10                      | 0.9973               | 1                  |
| <i>Microcystis</i> mcyB           | 19.2 – 1.92E+07   | 1.03                      | 0.9989               | 1                  |
| <i>Microcystis</i> 16S            | 39.7 - 3.97E+07   | 1.01                      | 0.9978               | 1                  |

References:

- [1] Morimoto D, Tominaga K, Nishimura Y, Yoshida N, Kimura S, Sako Y, Yoshida T. 2019. Cooccurrence of broad- and narrow-host-range viruses infection the bloom-forming toxic cyanobacterium *Microcystis aeruginosa*. *Appl Environ Microbiol* 85:1–17.
